# Supplementary material for: Green synthesis of amphiphilic carbon dots from organic solvents: application in fluorescent polymer composites and bio-imaging
Source: Royal Society of Chemistry journal article supplement (doi:10.1039/c8ra01085d), 2018-01-01
Supplement: c8ra01085d1.pdf [file c8ra01085d1.pdf]

Electronic Supplementary Information

**Green synthesis of amphiphilic carbon dots from organic solvents:  
application in fluorescent polymer composites and bio-imaging**

Jiangjiang Gu,<sup>a</sup> Xinle Li,<sup>b</sup> Donghua Hu,<sup>a</sup> Yanfeng Liu,<sup>a</sup> Guiyang Zhang,<sup>a</sup> Xudong  
Jia,<sup>a</sup> Wenyu Huang,<sup>\*b</sup> and Kai Xi<sup>\*a</sup>

<sup>a</sup> Department of Polymer Science & Engineering, Nanjing University, Nanjing  
210093, P.R. China.

<sup>b</sup> Department of Chemistry, Iowa State University, Ames, Iowa 50011, United States.

**Table S1.** Refractive index of various carbon dots (CDs).

| Reagent          | Water | DMF   | xylene | n-hexane | cyclohexane | DMAc  |
|------------------|-------|-------|--------|----------|-------------|-------|
| Refractive index | 1.333 | 1.437 | 1.497  | 1.388    | 1.426       | 1.435 |

**Table S2.** Quantum yields and photographs of solutions containing different CDs.

| Reagent                                     | DMF                                                                                 | xylene                                                                              | n-hexane                                                                            | cyclohexane                                                                           | DMAc                                                                                  |
|---------------------------------------------|-------------------------------------------------------------------------------------|-------------------------------------------------------------------------------------|-------------------------------------------------------------------------------------|---------------------------------------------------------------------------------------|---------------------------------------------------------------------------------------|
| Quantum yields                              | 33.9%                                                                               | 12.5%                                                                               | 9.7%                                                                                | 6.9%                                                                                  | 31.8%                                                                                 |
| Photographs of CDs under white light        |  |  |  |  |  |
| Photographs of CDs under UV light at 365 nm |  |  |  |  |  |

**Table S3.** The comparison of different CDs derived from organic solvents

| Carbon source | Method                 | Quantum yield | Reference |
|---------------|------------------------|---------------|-----------|
| DMF           | Microwave irradiation  | 9%            | S1        |
| Ethanol       | Electrochemistry       | 15%           | S2        |
| Dimethylamine | Microwave heating      | 8.9%          | S3        |
| DMF           | Hydrothermal treatment | 33.9%         | This work |
| DMAc          | Hydrothermal treatment | 31.8%         | This work |

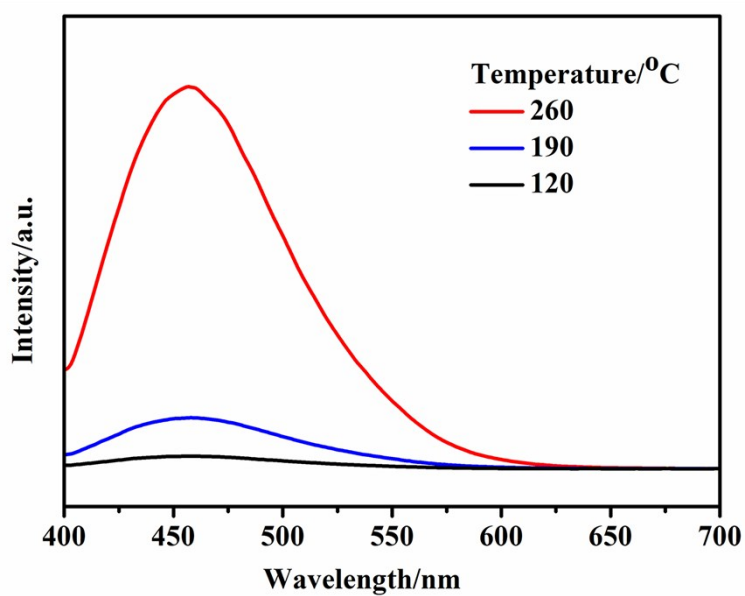

**Fig. S1.** PL emission spectra of DMF-CDs under different hydrothermal temperature.

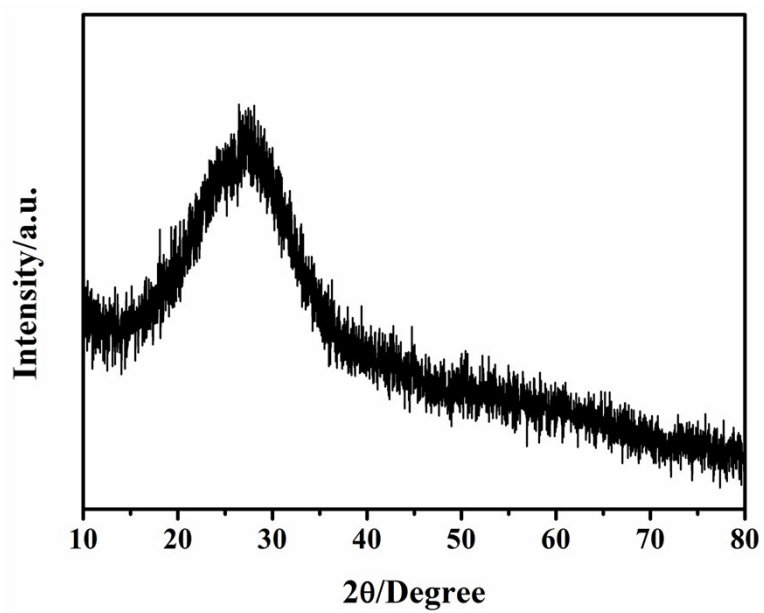

Fig. S2. XRD pattern of DMF-CDs.

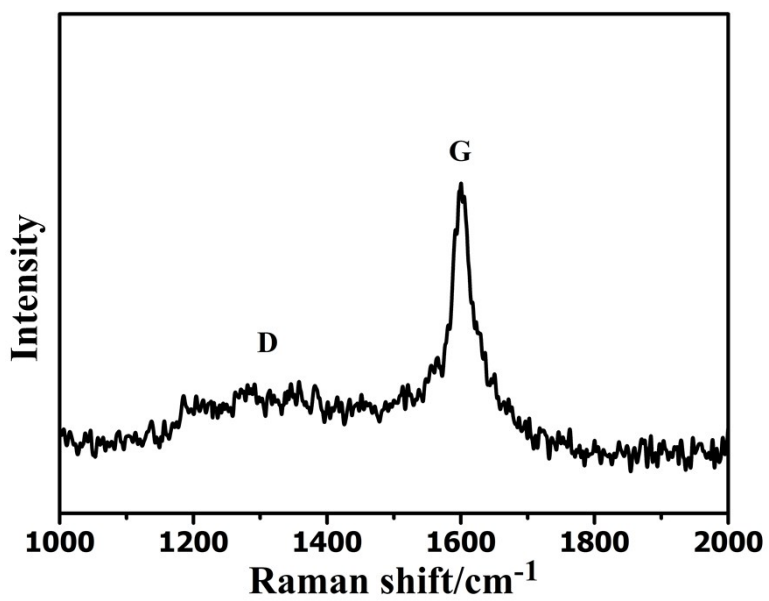

Fig. S3. Raman spectrum of DMF-CDs.

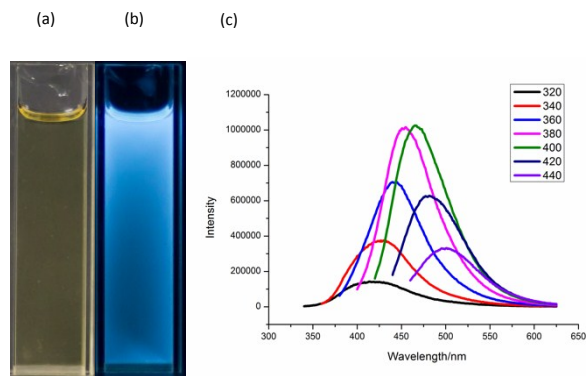

**Fig. S4.** Photographs of DMF-CDs under (a) white light, (b) UV light (365 nm), and (c) photoluminescence (PL) emission spectra of DMF-CDs.

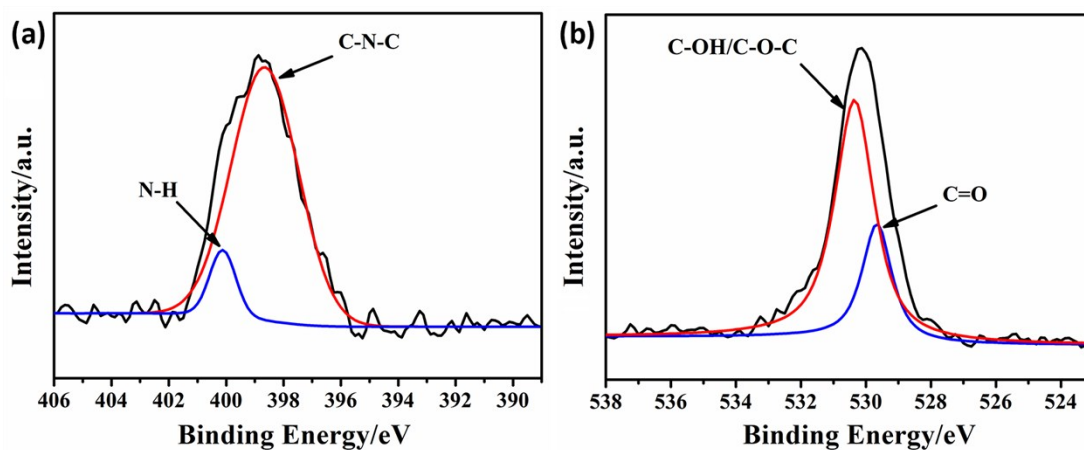

**Fig. S5.** XPS fitting of N 1s (a) and O 1s (b) in DMF-CDs.

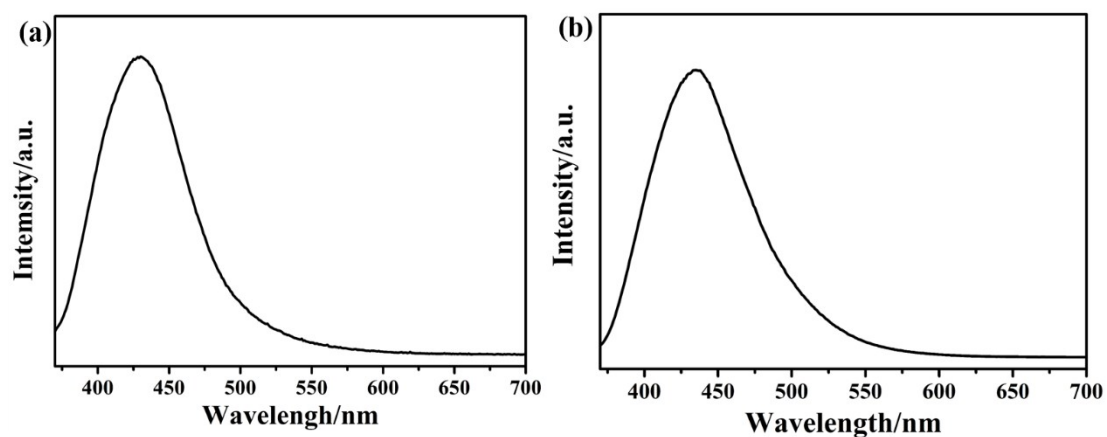

**Fig. S6.** PL emission spectra of DMF-CDs in (a) DMF and (b) H<sub>2</sub>O.

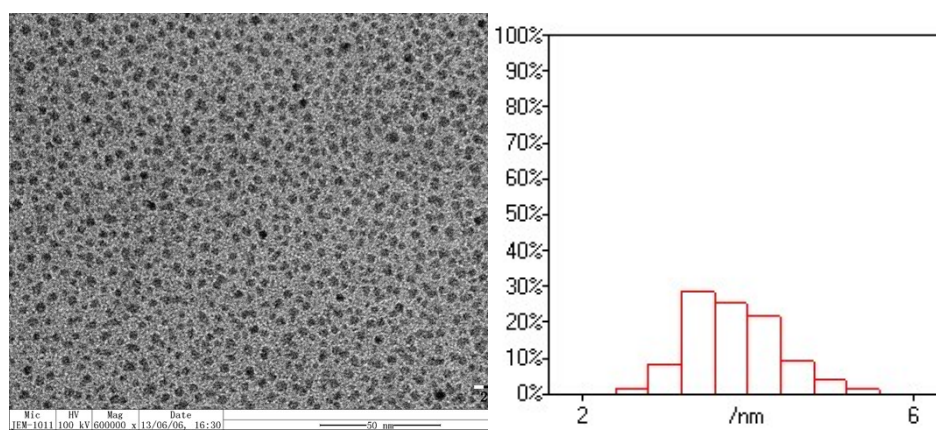

**Fig. S7.** (a) TEM image and (b) particle size distribution of DMF-CDs in H<sub>2</sub>O.

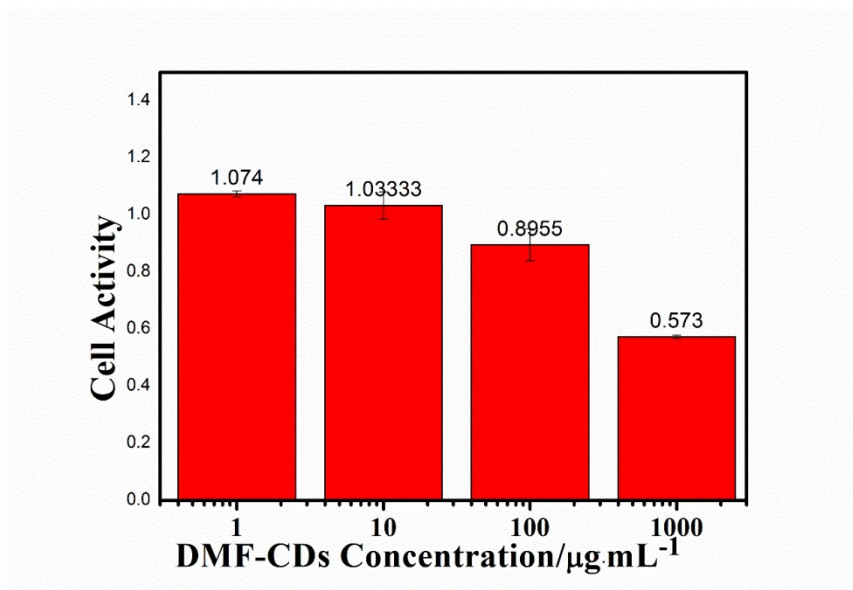

**Fig. S8.** Cell toxicity tests of DMF-CDs.

## References

- S1. S. Liu, L. Wang, J. Tian, J. Zhai, Y. Luo, W. Lua and X. Sun, *RSC Adv.*, 2011, **1**, 951.
- S2. J. Deng, Q. Lu, N. Mi, H. Li, M. Liu, M. Xu, L. Tan, Q. Xie, Y. Zhang and S. Yao, *Chem. Eur. J.*, 2014, **20**, 4993.
- S3. S. Liu, J. Tian, L. Wang, Y. Luo and X. Sun, *RSC Adv.*, 2012, **2**, 411.
